# Supplementary material for: SARS-CoV-2 Omicron BA.5: Evolving tropism and evasion of potent humoral responses and resistance to clinical immunotherapeutics relative to viral variants of concern
Source: bioRxiv or medRxiv preprint supplement (doi:10.1101/2022.07.07.22277128), 2022-07-10
Supplement: Supplementary file [file media-1.pdf]

Supplementary figure 1: Expression of ACE2 and TMPRSS2 in Hek 293T, HAT-24 and Calu-3

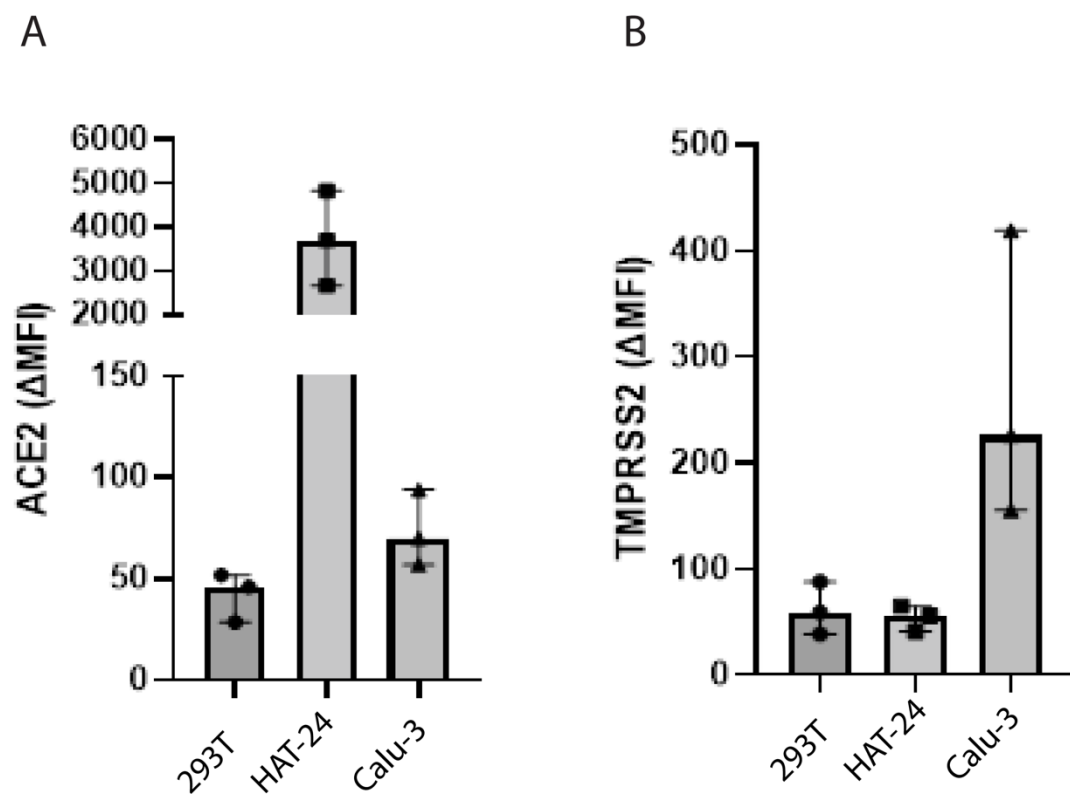

Figure S1: Expression ACE2 (A) and TMPRSS (B) was examined in Hek293T, ACE2-TMPRSS2 293T (HAT-24) and Calu-3 cells was examined using flow cytometry. Shown are the mean and standard deviations from three independent experiments.
